# Supplementary material for: To 3D or Not to 3D, That Is the Question: Do 3D Surface Analyses Improve the Ecomorphological Power of the Distal Femur in Placental Mammals?
Source: PLoS One. 2014 Mar 14;9(3):e91719. doi: 10.1371/journal.pone.0091719 (PMC3954759; doi:10.1371/journal.pone.0091719)
Supplement: Table S1 — List of specimens used in the analyses. (XLSX) [file pone.0091719.s001.xlsx]

## Sheet: Sheet1
Table S1: List of specimens used in the analysis
Specimen_number	Order	Genus	Species
USNM144117	Carnivora	Arctitis	binturong
USNM197252	Carnivora	Arctitis	binturong
USNM270181	Carnivora	Arctitis	binturong
USNM251158	Carnivora	Potos	flavus
USNM281522	Carnivora	Potos	flavus
USNM449468	Carnivora	Potos	flavus
USNM503823	Carnivora	Potos	flavus
USNM503824	Carnivora	Potos	flavus
USNM267592	Rodentia	Coendou	prehensilis
USNM281898	Rodentia	Coendou	prehensilis
USNM292303	Rodentia	Coendou	prehensilis
USNM314978	Rodentia	Coendou	prehensilis
USNM241005	Rodentia	Erethizon	dorsatum
USNM564250	Rodentia	Erethizon	dorsatum
USNM568395	Rodentia	Erethizon	dorsatum
USNM822	Rodentia	Erethizon	dorsatum
USNM197320	Rodentia	Petaurista	petaurista
USNM589068	Rodentia	Petaurista	petaurista
USNM589071	Rodentia	Petaurista	petaurista
USNM589075	Rodentia	Petaurista	petaurista
USNM155401	Rodentia	Ratufa	sp.
USNM269970	Rodentia	Ratufa	macroura
USNM49703	Rodentia	Ratufa	bicolor
USNM248247	Rodentia	Sciurus	carolinensis
USNM248250	Rodentia	Sciurus	carolinensis
USNM397210	Rodentia	Sciurus	carolinensis
USNM01075	Artiodactyla	Pecari	tajacu
USNM14081	Artiodactyla	Pecari	tajacu
USNM14084	Artiodactyla	Pecari	tajacu
USNM197672	Artiodactyla	Tragulus	napu
USNM197682	Artiodactyla	Tragulus	napu
USNM49605	Artiodactyla	Tragulus	napu
USNM49772	Artiodactyla	Tragulus	napu
USNM49871	Artiodactyla	Tragulus	napu
USNM01326	Carnivora	Canis	latrans
USNM261745	Carnivora	Canis	latrans
USNM263786	Carnivora	Canis	latrans
USNM154249	Carnivora	Vulpes	zerda
USNM22465	Carnivora	Vulpes	zerda
USNM322033	Carnivora	Vulpes	zerda
USNM322835	Carnivora	Vulpes	zerda
USNM325875	Carnivora	Vulpes	zerda
USNM220266	Rodentia	Dasyprocta	cristata
USNM252297	Rodentia	Dasyprocta	azarae
USNM261397	Rodentia	Dasyprocta	punctata
USNM397115	Rodentia	Dasyprocta	punctata
USNM49736	Rodentia	Dasyprocta	mexicana
USNM575677	Rodentia	Dasyprocta	punctata
USNM257010	Rodentia	Dolichotis	salinicola
USNM252146	Carnivora	Ailurus	fulgens
USNM256098	Carnivora	Ailurus	fulgens
USNM258350	Carnivora	Ailurus	fulgens
USNM258850	Carnivora	Ailurus	fulgens
USNM259379	Carnivora	Ailurus	fulgens
USNM01619	Carnivora	Bassariscus	astutus
USNM051507	Carnivora	Bassariscus	astutus
USNM051864	Carnivora	Bassariscus	astutus
USNM24023	Carnivora	Bassariscus	astutus
USNM49734	Carnivora	Bassariscus	astutus
USNM256177	Carnivora	Eira	barbara
USNM259003	Carnivora	Eira	barbara
USNM338978	Carnivora	Eira	barbara
USNM361036	Carnivora	Eira	barbara
USNM362120	Carnivora	Eira	barbara
USNM248216	Carnivora	Gulo	gulo
USNM257989	Carnivora	Gulo	gulo
USNM265586	Carnivora	Gulo	gulo
USNM265587	Carnivora	Gulo	gulo
USNM265588	Carnivora	Gulo	gulo
USNM188221	Carnivora	Martes	pennanti
USNM188225	Carnivora	Martes	pennanti
USNM188226	Carnivora	Martes	pennanti
USNM21233	Carnivora	Martes	pennanti
USNM30624	Carnivora	Martes	pennanti
USNM00983	Carnivora	Nasua	narica
USNM22810	Carnivora	Nasua	narica
USNM257314	Carnivora	Nasua	narica
USNM196623	Carnivora	Paradoxurus	hermaphroditus
USNM197243	Carnivora	Paradoxurus	hermaphroditus
USNM198064	Carnivora	Paradoxurus	hermaphroditus
USNM277230	Carnivora	Paradoxurus	hermaphroditus
USNM49702	Carnivora	Paradoxurus	hermaphroditus
USNM187907	Carnivora	Procyon	lotor
USNM396237	Carnivora	Procyon	lotor
USNM396274	Carnivora	Procyon	lotor
USNM567941	Carnivora	Procyon	lotor
USNM597942	Carnivora	Procyon	lotor
USNM260642	Carnivora	Ursus	americanus
USNM303193	Carnivora	Ursus	americanus
USNM308296	Carnivora	Ursus	americanus
USNM221377	Hyracoidea	Procavia	capensis
USNM305093	Hyracoidea	Procavia	capensis
USNM351945	Hyracoidea	Procavia	capensis
USNM399041	Hyracoidea	Procavia	capensis
USNM464898	Hyracoidea	Procavia	capensis
USNM397325	Rodentia	Kerodon	rupestris
USNM543101	Rodentia	Kerodon	rupestris
USNM314046	Artiodactyla	Hexaprotodon	liberiensis
USNM582095	Artiodactyla	Hexaprotodon	liberiensis
USNM318107	Carnivora	Fossa	fossana
USNM328550	Carnivora	Herpestes	edwardsii
USNM328565	Carnivora	Herpestes	edwardsii
USNM329348	Carnivora	Herpestes	edwardsii
USNM329349	Carnivora	Herpestes	edwardsii
USNM329350	Carnivora	Herpestes	edwardsii
USNM253504	Carnivora	Speothos	venaticus
USNM270165	Carnivora	Speothos	venaticus
USNM270368	Carnivora	Speothos	venaticus
USNM270369	Carnivora	Speothos	venaticus
USNM270370	Carnivora	Speothos	venaticus
USNM240208	Carnivora	Viverra	zibetha
USNM258341	Carnivora	Viverra	zibetha
USNM12290	Perissodactyla	Tapirus	terrestris
USNM261025	Perissodactyla	Tapirus	terrestris
USNM270353	Perissodactyla	Tapirus	terrestris
USNM281393	Perissodactyla	tapirus	terrestris
USNM13057	Rodentia	Agouti	paca
USNM155610	Rodentia	Agouti	paca
USNM251162	Rodentia	Agouti	paca
USNM252519	Rodentia	Agouti	paca
USNM396150	Rodentia	Agouti	paca
USNM20900	Rodentia	Cavia	porcellus
USNM281738	Rodentia	Cavia	porcellus
USNM35083	Rodentia	Cavia	porcellus
USNM241103	Rodentia	Hydrochoerus	hydrochoerus
USNM269946	Rodentia	Hydrochoerus	hydrochoerus
USNM03459	Carnivora	Lontra	canadensis
USNM484802	Carnivora	Lontra	canadensis
USNM484803	Carnivora	Lontra	canadensis
USNM484809	Carnivora	Lontra	canadensis
USNM49902	Carnivora	Lontra	canadensis
USNM259466	Carnivora	Lutra	lutra
USNM266378	Rodentia	Castor	canadensis
USNM484534	Rodentia	Castor	canadensis
USNM484540	Rodentia	Castor	canadensis
USNM484541	Rodentia	Castor	canadensis
USNM194109	Rodentia	Ondatra	zibethecus
USNM246330	Rodentia	Ondatra	rivalica
USNM246331	Rodentia	Ondatra	rivalica
USNM567819	Rodentia	Ondatra	zibethicus
USNM567820	Rodentia	Ondatra	zibethecus
USNM567823	Rodentia	Ondatra	zibethecus
USNM22253	Carnivora	Meles	meles
USNM534226	Carnivora	Meles	meles
USNM534227	Carnivora	Meles	meles
USNM01389	Carnivora	Taxidea	taxus
USNM259041	Carnivora	Taxidea	taxus
USNM262103	Carnivora	Taxidea	taxus
USNM264140	Carnivora	Taxidea	taxus
USNM56470	Rodentia	Aplodontia	rufa
USNM77975	Rodentia	Aplodontia	?
USNM132279	Rodentia	Ctenomys	magellanicus
USNM022577	Rodentia	Cynomys	ludivicianus
USNM564088	Rodentia	Cynomys	ludovicianus
USNM589596	Rodentia	Cynomys	ludovicianus
USNM589598	Rodentia	Cynomys	ludovicianus
USNM172844big	Rodentia	Lagostomus	sp
USNM172844small	Rodentia	Lagostomus	sp
USNM172852	Rodentia	Lagostomus	sp
USNM256438	Rodentia	Lagostomus	sp
USNM259345	Rodentia	Marmota	monax
USNM397378	Rodentia	Marmota	monax
USNM514747	Rodentia	Marmota	monax
USNM514748	Rodentia	Marmota	monax
